# Supplementary material for: COMT Val/Met and Psychopathic Traits in Children and Adolescents: A Systematic Review and New Evidence of a Developmental Trajectory toward Psychopathy
Source: MDPI journal article supplement (doi:10.3390/ijms23031782), 2022-02-04
Supplement: s1 [file s1]

**Supplementary Table S1.** Sample Characteristics for Males and Females Below and Above Age 13, based on *COMT* Val158Met Val and Met alleles

|                                                            | Males                          |                                |                                |                                |                             |                             | Females                         |                             |                             |                               |                             |                             |
|------------------------------------------------------------|--------------------------------|--------------------------------|--------------------------------|--------------------------------|-----------------------------|-----------------------------|---------------------------------|-----------------------------|-----------------------------|-------------------------------|-----------------------------|-----------------------------|
|                                                            | Below age 13 ( <i>n</i> = 81)  |                                |                                | Above age 13 ( <i>n</i> =59)   |                             |                             | Below age 13 ( <i>n</i> = 70)   |                             |                             | Above age 13 ( <i>n</i> = 70) |                             |                             |
|                                                            | Val/Val<br>( <i>n</i> = 22)    | Val/Met<br>( <i>n</i> = 36)    | Met/Met<br>( <i>n</i> = 23)    | Val/Val<br>( <i>n</i> = 17)    | Val/Met<br>( <i>n</i> = 30) | Met/Met<br>( <i>n</i> = 12) | Val/Va<br>l<br>( <i>n</i> = 22) | Val/Met<br>( <i>n</i> = 30) | Met/Met<br>( <i>n</i> = 18) | Val/Val<br>( <i>n</i> = 24)   | Val/Met<br>( <i>n</i> = 34) | Val/Val<br>( <i>n</i> = 22) |
| Mean age (S.D)                                             | 9.95 (2.07)                    | 10.43 (1.88)                   | 10.03 (2.28)                   | 14.59<br>(1.35)                | 15.03 (1.70)                | 14.25 (1.05)                | 10.70<br>(1.85)                 | 10.42 (1.83)                | 9.84 (2.12)                 | 14.59<br>(1.24)               | 14.95 (1.28)                | 15.07 (1.45)                |
| Mean CBCL<br>Aggressive<br>Behavior (S.D)                  | 66.3 (16.59)                   | 65.31<br>(16.15)               | 72.52<br>(16.18)               | <b>66.76</b><br><b>(14.29)</b> | <b>75 (12.76)</b>           | <b>61.91 (12.32)</b>        | 56.09<br>(8.65)                 | 64.38 (14.12)               | 61.63 (15.77)               | 70.14<br>(14.60)              | 71.83 (15.87)               | 66.45 (15.04)               |
| Mean CBCL<br>Attention Deficit /<br>Hyperactivity<br>(S.D) | 63.25<br>(12.86)               | 57.4 (10.93)                   | 63.77 (8.70)                   | 61.5<br>(8.80)                 | 65.38 (7.17)                | 58.43 (9.88)                | 55.8<br>(5.68)                  | 61.33 (10.55)               | 59.5 (12.45)                | 66.4<br>(10.59)               | 68.57 (9.63)                | 63.31 (22.53)               |
| Mean CBCL<br>Oppositional<br>Defiant Problems<br>(S.D)     | <b>68.75</b><br><b>(12.16)</b> | <b>58.35</b><br><b>(11.55)</b> | <b>65.92</b><br><b>(11.62)</b> | <b>60.33</b><br><b>(12.40)</b> | <b>70.56 (7.85)</b>         | <b>61.14 (8.71)</b>         | 55.4<br>(6.59)                  | 61.39 (10.48)               | 61.2 (13.35)                | 65.4<br>(10.47)               | 69.43 (10.76)               | 66.23 (12.19)               |
| Mean CBCL<br>Conduct Problems<br>(S.D)                     | <b>68.5 (13.83)</b>            | <b>58.65</b><br><b>(13.00)</b> | <b>71.08</b><br><b>(13.80)</b> | 63.17<br>(15.21)               | 72.69 (9.88)                | 62.29 (10.97)               | 53.13<br>(5.78)                 | 62 (12.69)                  | 59.1 (12.44)                | 73.2 (16)                     | 75.14 (12.03)               | 69.69 (13.78)               |
| Mean PSD<br>Narcissism<br>subscale (S.D)                   | 0.56 (0.45)                    | 0.61 (0.53)                    | 0.81 (0.63)                    | 0.80<br>(0.50)                 | 1.05 (0.52)                 | 0.64 (0.45)                 | 0.41<br>(0.31)                  | 0.52 (0.45)                 | 0.31 (0.31)                 | 0.95 (0.68)                   | 0.84 (0.64)                 | 0.63 (0.60)                 |
| Mean PSD<br>Impulsivity<br>subscale (S.D)                  | <b>0.86 (0.62)</b>             | <b>0.88 (0.67)</b>             | <b>1.25 (0.48)</b>             | 1.22<br>(0.63)                 | 1.35 (0.56)                 | 0.82 (0.67)                 | 0.49<br>(0.34)                  | 0.82 (0.65)                 | 0.77 (0.55)                 | 1.2 (0.70)                    | 1.24 (0.70)                 | 1.03 (0.68)                 |

|                                                                 |            |             |             |                        |                    |                    |                |             |             |            |             |             |
|-----------------------------------------------------------------|------------|-------------|-------------|------------------------|--------------------|--------------------|----------------|-------------|-------------|------------|-------------|-------------|
| Mean PSD<br>Callous-<br>Unemotional<br>Traits subscale<br>(S.D) | 0.9 (0.36) | 0.88 (0.46) | 0.89 (0.52) | <b>1.05<br/>(0.46)</b> | <b>1.12 (0.29)</b> | <b>0.78 (0.24)</b> | 0.76<br>(0.37) | 0.81 (0.38) | 0.93 (0.43) | 0.9 (0.55) | 0.95 (0.45) | 0.86 (0.43) |
|-----------------------------------------------------------------|------------|-------------|-------------|------------------------|--------------------|--------------------|----------------|-------------|-------------|------------|-------------|-------------|

note: **bold:**  $p < 0.05$
