# Supplementary material for: COMT Val/Met and Psychopathic Traits in Children and Adolescents: A Systematic Review and New Evidence of a Developmental Trajectory toward Psychopathy
Source: MDPI journal article supplement (doi:10.3390/ijms23031782), 2022-02-04
Supplement: s1 [file s1]

## Supplementary Material S1

### **Results for the Kruskal-Wallis tests for Val/Val vs Val/Met vs Met/Met:**

Male  $\geq 13$ :

- CBCL Aggressive Behavior:  $p = 0.021$
- CBCL Oppositional Defiant Problems:  $p = 0.037$
- PSD Callous-Unemotional Traits subscale:  $p = 0.022$

Male  $< 13$ :

- CBCL Oppositional Defiant Problems:  $p = 0.048$
- CBCL Conduct Problems:  $p = 0.021$
- PSD Impulsivity subscale:  $p = 0.040$

Female  $\geq 13$ :

- N/A

Female  $< 13$ :

- N/A

### **Dunn Post Hoc tests:**

0 -> Val/Val

1 -> Val/Met

2 -> Met/Met

Male  $\geq 13$ :

- CBCL Aggressive Behavior:  $p = 0.021$ 
  - 0 vs 1:  $p = 0.0379$
  - 0 vs 2:  $p = 0.1575$
  - 1 vs 2:  $p = 0.0044$
- CBCL Oppositional Defiant Problems:  $p = 0.037$ 
  - 0 vs 1:  $p = 0.0220$
  - 0 vs 2:  $p = 0.4939$
  - 1 vs 2:  $p = 0.0175$
- PSD Callous-Unemotional Traits subscale:  $p = 0.022$ 
  - 0 vs 1:  $p = 0.3111$
  - 0 vs 2:  $p = 0.0166$
  - 1 vs 2:  $p = 0.0166$

Male  $< 13$ :

- CBCL Oppositional Defiant Problems:  $p = 0.048$ 
  - 0 vs 1:  $p = 0.0146$

- 0 vs 2:  $p = 0.2721$
  - 1 vs 2:  $p = 0.0362$
- CBCL Conduct Problems:  $p = 0.021$ 
  - 0 vs 1:  $p = 0.0399$
  - 0 vs 2:  $p = 0.3279$
  - 1 vs 2:  $p = 0.0044$
- PSD Impulsivity subscale:  $p = 0.040$ 
  - 0 vs 1:  $p = 0.4366$
  - 0 vs 2:  $p = 0.0258$
  - 1 vs 2:  $p = 0.0085$

Female  $\geq 13$ :

- N/A

Female  $< 13$ :

- N/A
